# Supplementary material for: Development of a multi-enzyme cascade for 2′3′-cGAMP synthesis from nucleosides
Source: Royal Society of Chemistry journal article supplement (doi:10.1039/d4cy00147h), 2024-01-01
Supplement: d4cy00147h1.pdf [file d4cy00147h1.pdf]

**Supplementary Information: Development of a multi-enzyme cascade for 2'3'-cGAMP synthesis from nucleosides**

Martin Becker <sup>b</sup>, Isabel Nowak <sup>b</sup>, Katharina Hildebrand <sup>b</sup>, Stephan Lütz <sup>b</sup> and Katrin Rosenthal <sup>\*a</sup>

[a] Prof. Dr. K. Rosenthal  
School of Science  
Constructor University  
Campus Ring 1, 28759 Bremen (Germany)  
E-mail: krosenthal@constructor.university

[b] M. Becker, Isabel Nowak, Katharina Hildebrand, Prof. Dr. S. Lütz  
Department of Biochemical and Chemical Engineering  
Chair for Bioprocess Engineering, TU Dortmund University  
Emil-Figge-Straße 66, 44227 Dortmund (Germany)

## Content

|                                                |   |
|------------------------------------------------|---|
| 1. Experimental data .....                     | 3 |
| 1.1 Specific <i>thscGAS</i> activity .....     | 3 |
| 1.2 Temperature stability of ATP and GTP ..... | 4 |
| 1.3 Turnover numbers (TONs) .....              | 5 |
| 2. SDS gels .....                              | 5 |
| 3. HPLC and LC-MS measurements .....           | 7 |
| 4. DNA sequences .....                         | 8 |

## 1. Experimental data

### 1.1 Specific *thscGAS* activity

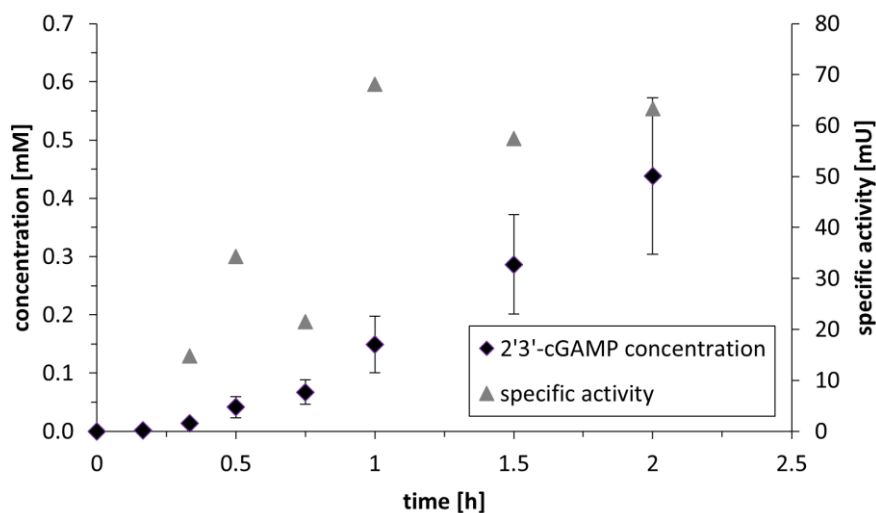

**Figure S1: Determination of the specific *thscGAS* activity for the 2'3'-cGAMP formation from guanosine**

Progress of 2'3'-cGAMP-formation within the first 2 h using 0.08 mg/mL *thscGAS* in 1.5 mL Eppendorf tubes at 37 °C in biological triplicates. Samples were taken after 10, 20, 30, 45, 60, 90 and 120 min and analyzed by HPLC.

The specific enzyme activity of  $43.0 \pm 13.7$  mU/mg was calculated from the mean activity between the measuring points in the range between 20 min and 2 h.

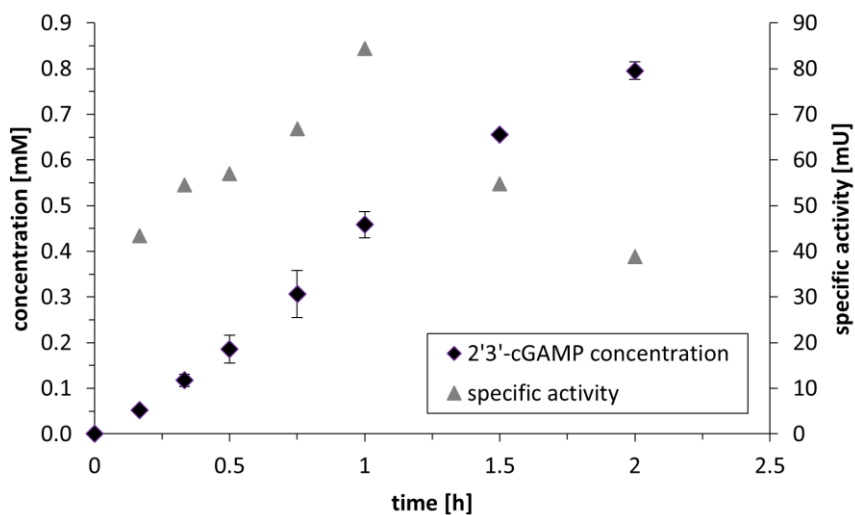

**Figure S2: Determination of the specific *thscGAS* activity for the 2'3'-cGAMP formation from adenosine and guanosine**

Progress of 2'3'-cGAMP formation within the first 2 h using 0.12 mg/mL *thscGAS* in 1.5 mL Eppendorf tubes at 37 °C in biological triplicates. Samples were taken after 10, 20, 30, 45, 60, 90 and 120 min and analyzed by HPLC.

The specific enzyme activity of  $50.0 \pm 2.2$  mU/mg was calculated from the mean activity between the measuring points in the range between 0 min and 2 h.

## 1.2 Temperature stability of ATP and GTP

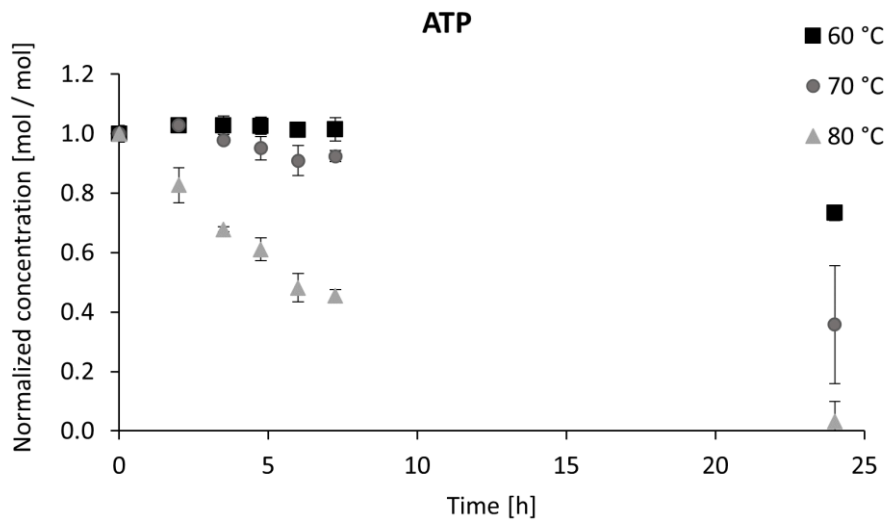

**Figure S3: Temperature stability of ATP at 60 °C, 70 °, 80 °C.**

In 1.5 mL Eppendorf tubes, 1 mL of 5 mM ATP in 50 mM TRIS-HCl, 40 mM  $MgCl_2 \cdot 6H_2O$  activity buffer was incubated in duplicates at 60 °C, 70 °C, and 80 °C. Samples were taken after 0, 2, 3.5, 4.75, 6, 7.25 and 24 h and analyzed by HPLC. The measured concentrations were normalized to the 0 h sample.

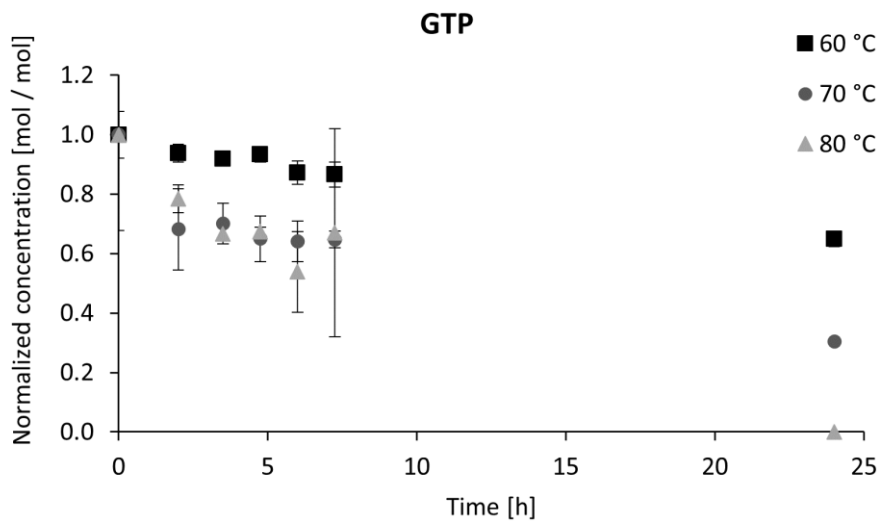

**Figure S4: Temperature stability of GTP at 60 °C, 70 °, 80 °C.**

In 1.5 mL Eppendorf tubes, 1 mL of 5 mM GTP in 50 mM TRIS-HCl, 40 mM  $MgCl_2 \cdot 6H_2O$  activity buffer was incubated in duplicates at 60 °C, 70 °C, and 80 °C. Samples were taken after 0, 2, 3.5, 4.75, 6, 7.25 and 24 h and analyzed by HPLC. The measured concentrations were normalized to the 0 h sample.

## 1.3 Turnover numbers (TONs)

**Table S1: TONs of the Guanosine Cascade**

TONs were calculated for the indicated reaction conditions from the enzyme concentration and the difference between the initial and final product concentration of the assays. In the case of class III PPK2s, the transfer of a single phosphate group was considered separately.

| Enzyme                          | TON   |
|---------------------------------|-------|
| <i>Mj</i> NK                    | 1,751 |
| <i>Ch</i> PPK2 + <i>Eb</i> PPK2 | 953   |
| <i>thsc</i> GAS                 | 847   |

**Table S2: TONs of the Nucleoside Cascade**

TONs were calculated for the indicated reaction conditions from the enzyme concentration and the difference between the initial and final product concentration of the assays. In the case of class III PPK2s, the transfer of a single phosphate group was considered separately. In the case of *Ch*PPK2, step 2 was not considered as no activity was observed. Only the first reaction step was considered for the *Sc*ADK and only steps three and four for the *Mj*NK, as the corresponding substrates were consumed after these steps. For the calculations of *Eb*PPK2 and *Ch*PPK2 in the last two reaction steps, the consumption of AMP and GMP and the formation of 2'3'-cGAMP were considered.

| Enzyme                                               | TON    |
|------------------------------------------------------|--------|
| <i>Sc</i> ADK                                        | 7,365  |
| <i>Ch</i> PPK2 step 1                                | 10,458 |
| <i>Mj</i> NK                                         | 527    |
| <i>Ch</i> PPK2 + <i>Eb</i> PPK2 in step 3 and step 4 | 6,558  |
| <i>thsc</i> GAS                                      | 672    |

## 2. SDS gels

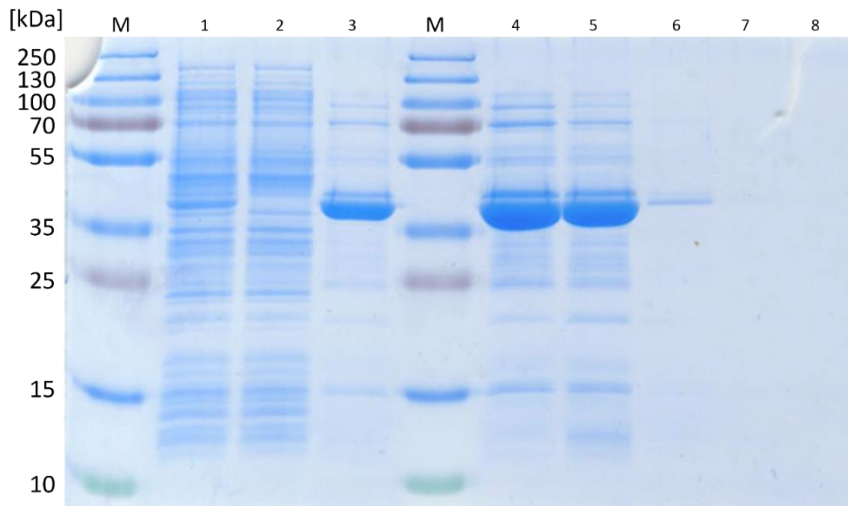

**Figure S5: SDS-PAGE to verify protein purification using *Sc*ADK (37 kDa) as an example.**

Order of lanes: lane M: PageRuler Prestained Protein Ladder #26619, lane 1: filtered lysate after cell disruption, lane 2: IMAC flow-through, lane 3: purified enzyme after buffer exchange, lane 4: IMAC fraction 1, lane 5: IMAC fraction 2, lane 6: IMAC fraction 3, lane 7: IMAC fraction 4, lane 8: IMAC fraction 5.

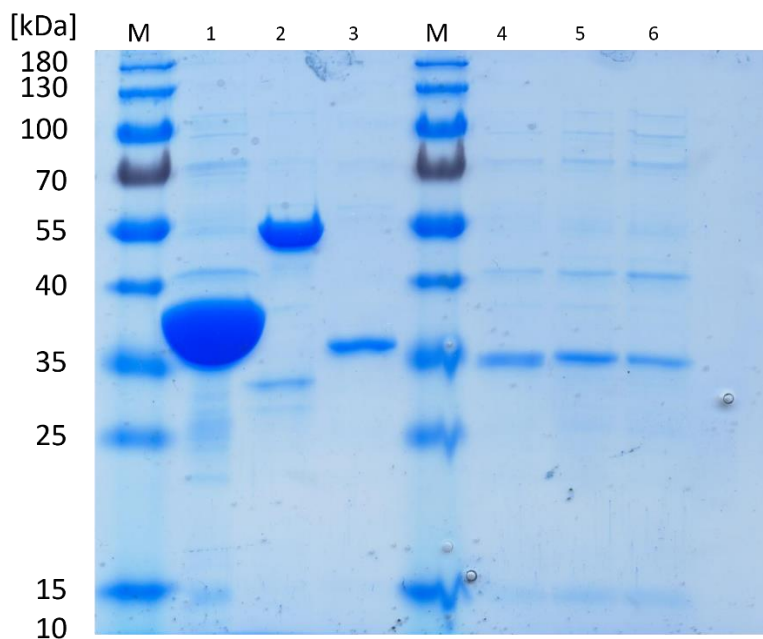

**Figure S6: SDS-PAGE of purified enzymes used for enzyme screening.**

Order of lanes: lane M: PageRuler Prestained Protein Ladder #26616, lane 1: ScADK (37 kDa), lane 2: AjPPK2 (58 kDa), lane 3: SmPPK2 (37 kDa), lane 4: MrPPK2 (32 kDa), lane 5: MjNK 2 (34 kDa), lane 6: EbPPK2 (35 kDa).

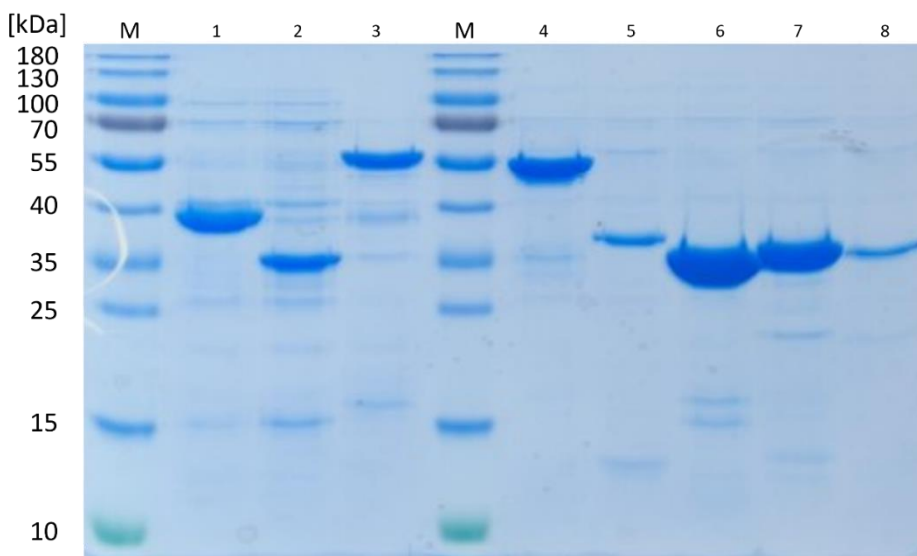

**Figure S7: SDS-PAGE of all purified proteins used for the development of the enzyme cascades. The purified ChPPK2 was additionally used for enzyme screening.**

Order of lanes: lane M: PageRuler Prestained Protein Ladder #26616, lane 1: ScADK (37 kDa), lane 2: MjNK (34 kDa), lane 3: thscGAS (56 kDa), lane 4: AjPPK2 (58 kDa), lane 5: SmPPK2 (37 kDa), lane 6: EbPPK2 (35 kDa), lane 7: ChPPK2 (37 kDa), lane 8: MrPPK2 (32 kDa).

### 3. HPLC and LC-MS measurements

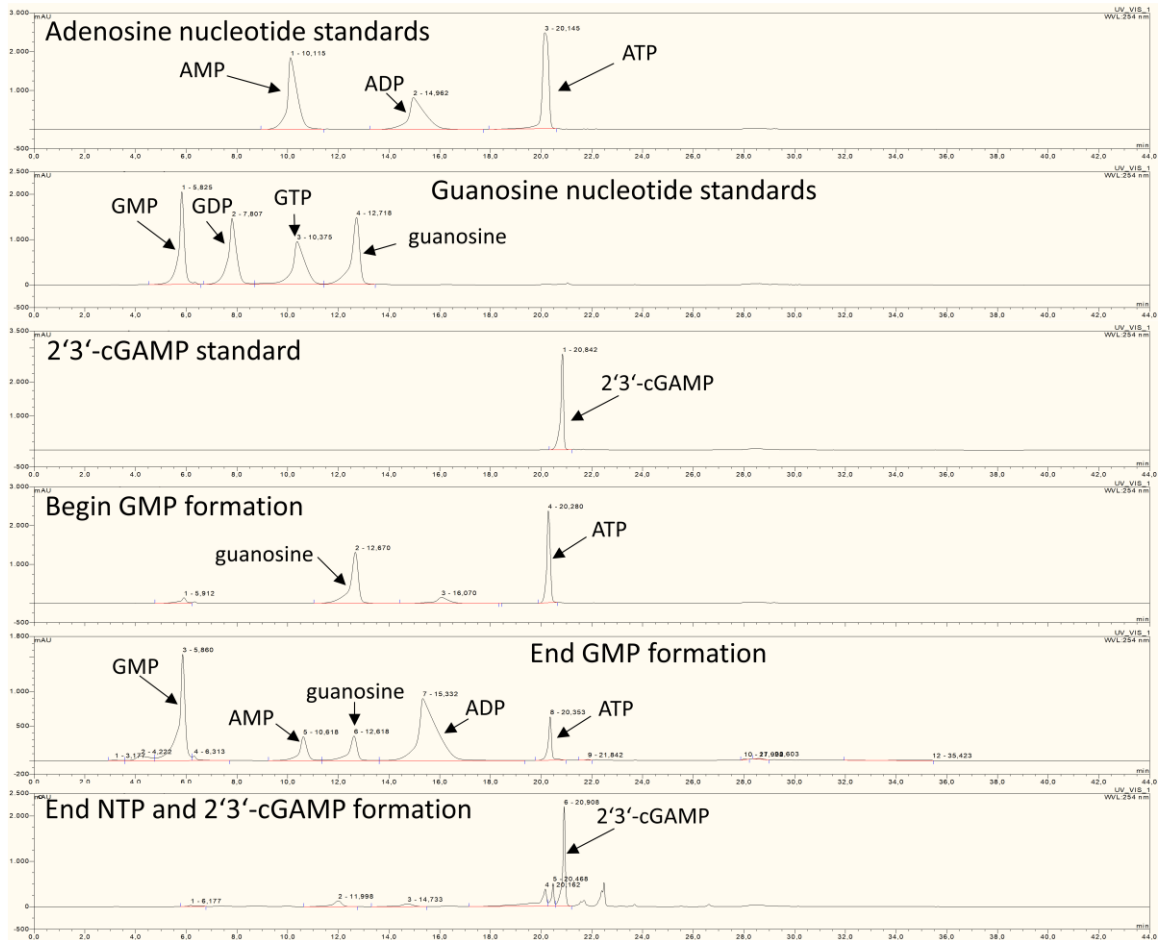

Figure S8: Illustrative HPLC chromatograms of standards and samples for 2'3'-cGAMP formation from guanosine.

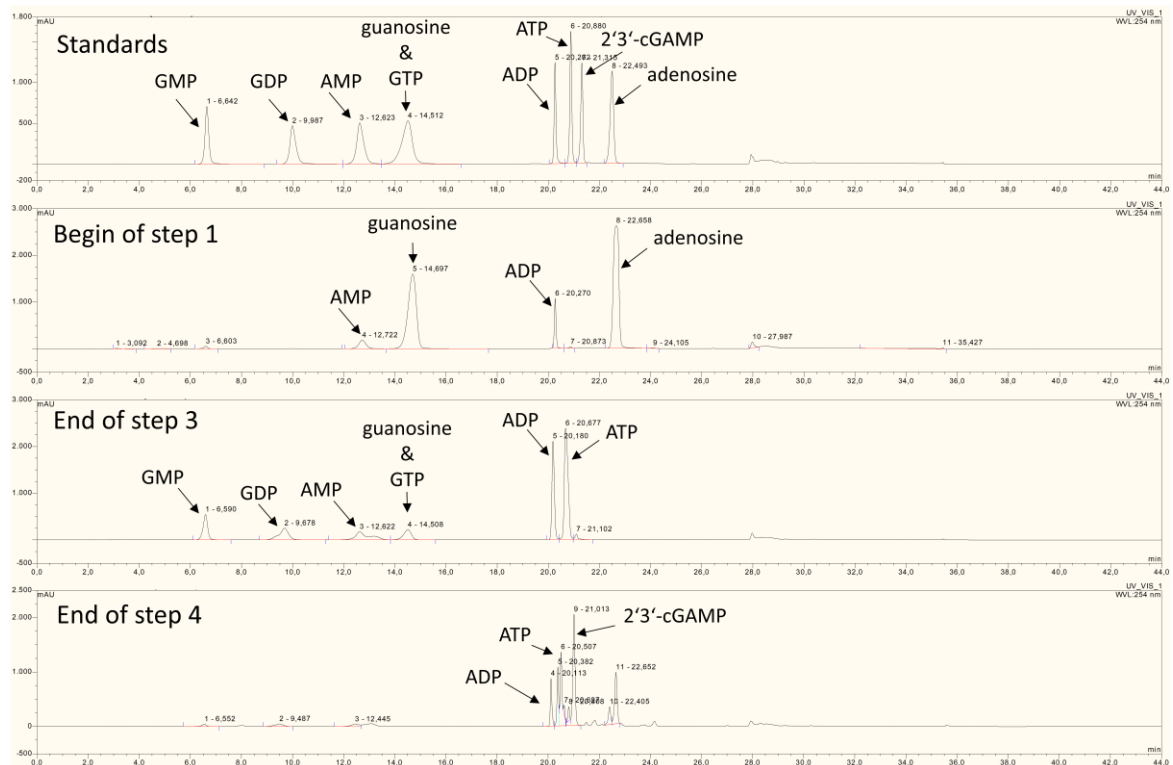

Figure S9: Illustrative HPLC chromatograms of standards and samples for 2'3'-cGAMP formation from nucleosides.

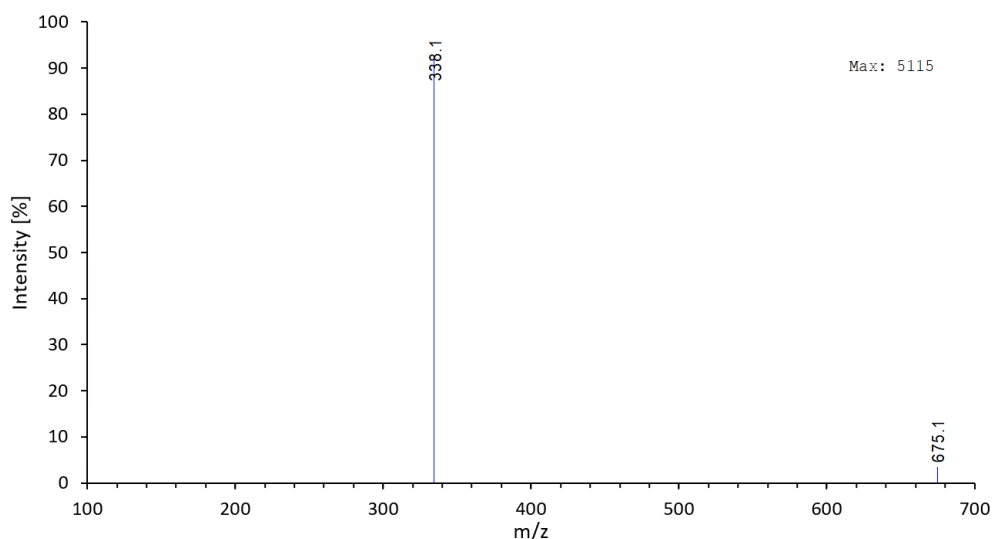

**Figure S10: LC-MS SIM measurements of 2'3'-cGAMP formation from nucleosides after 24 h reaction.**

The mass 675 m/z was extracted. The signal with mass 675 m/z corresponds to single ionized 2'3'-cGAMP and the signal at 338 to double ionized 2'3'-cGAMP.

#### 4. DNA sequences

##### **ScADK:**

UniProt: P47143

ATGACCGCACCATTGGTAGTATTGGGTAACCCACTTTTAGATTCCAAGCCGACGTCACGGCTGAATACCTGGC  
 CAAGTATTCTCTAAAGGAAAACGACGCAATTTGGTTCGATGCCAAATCAGGCGATGCTAAGATGGCTATTTTTG  
 ACGAGCTCTTACAGATGCCAGAAACAAAGCTTGTTGCAGGTGGTGTCTGCTCAAACACTGCTAGAGGGGCAG  
 CATACGTTTTGGGCGCCGGCCAGGTGGTGTACTTCGTTCCGTCGGTAAGGACAAGTTCAGCGAGAGATTGCT  
 TAACGAAAACGAAAAAGCTGGTGTCAAGTCTATGTACCAAGTTCAAATGATATTGGTACCGGTAAGTGTGCC  
 GCATTAATCACTGGCCATAACCGGTCCTTGGTCACTGACTGGGTGCTGCCAATTTCTTACTCCAGACCACTTG  
 GACAAGCATTGGGACTTGGTGAAGCAGCTAAGCTCTTCTACATCGGTGGTTCCACTTGACCGTGTCTCCAGA  
 CGCTATCGTTAAGTTGGGCAACATGCTAAAGAGAACAGCAAACCTTCGTGTTGAACCTTAGTGTCTCTTTCA  
 TTCCTCATGTCTTCAAAGACGATTGGCCAGATTTGCTTATGCTACCGTCATCATCGCTAACGAATCGGAG  
 GCCGAAGCCTTTTGCACGCCTTCCAATTAGACTGTGCCAACACTGATTTGGAAGCTATTGCTCAAAGAATTGT  
 CAAGGACTCTCCAGTTGAAAAGACTGTCATCTTCAACCCACGGTGTGCAACCAACAGTGGTGTCTCTCCAAG  
 GGTACCAGCACATATCCAGTCAAACCTTGGACTCTTCTAAGATCGTCGACACCAACGGTGTGGTGTGACGCCTT  
 CGCTGGTGGCTTTATGGCTGGGTTGACTAAAGGTGAAGATTTGAAAACCTCTATTGACATGGGTCAATGGCTA  
 GCTGCTTTGTCTATTCAAGAAGTTGGTCCCTCTTACCCTTCCGAAAAAATATCTTACTCTAAA

##### **MjNK:**

UniProt: Q57849

ATGGGTGGTAAAATGGAGAAGATTACATGTGTAGGGCATACTGCCCTTGATTATATCTTCAATGTAGAAAAAT  
 TTCCAGAACCGAATACTTCAATTCAAATTCCTTCGGCGAGAAAGTATTATGGTGGAGCAGCGGCAAATACAGC



AGTGGGAATAAAAAAAGCTTGGTGTTAATTCAGAGCTTTTATCATGTGTTGGCTATGATTTTAAAAATAGTGGAT  
ATGAGAGGTATTTAAGAATTTGGATATAAATATTTCTAAACTTTACTATTCTGAAGAAGAAGAAACACCAAAG  
GCATGGATATTTACAGACAAGGATAACAATCAGATAACTTTCTTTTTATGGGGAGCTGCTAAGCATTATAAGGA  
ACTAAACCCACCAAAGCTTCAATACAGAAATTGTCATATAGCCACTGGAGACCCAGAGTTCAACTTAAAATGTG  
CAAAAAAGCTTATGGAAACAATTTGGTCTCTTCGACCCCGGACAGGACTTACCTCAATACTCAAAAGAAATG  
TTGTTGGAAATTATTGAGCATACAACTTTTTATTTATGAATAAACATGAATTTGAGAGAGCATCTAATTTATTA  
AATTTTGAATTGATGATTATTTAGAGAGGGTTGATGCCCTTATAGTAACAAAAGTTCTAAGGGTA GTGTAAT  
ATACACTAAAGATAAAAAAATAGAAATTCCTTGTATTAAGCAGGGAAAAGTTATAGACCCAACAGGTGCTGGA  
GACAGCTATAGAGCTGGATTTTTATCTGCCTATGTCAAAGGGTATGATTTAGAGAAATGTGGTTAATTGGTGC  
TGCAACTGCCTCATTTGTTGTTGAGGCAAAGGGATGCCAACTAATTTACCAACATGGGATAAGGTTGTTGAG  
AGATTAGAAAAACACCGAATATAA

**AjPPK2:**

UniProt: Q83XD3

ATGGACACCGAAACCATTGCAAGCGCAGTTCTGAATGAAGAACAGCTGAGCCTGGATCTGATTGAAGCACAGT  
ATGCACTGATGAATACCCGTGATCAGAGCAATGCAAAAAGCCTGGTTATTCTGGTTAGCGGTATTGAACTGGC  
AGGTAAAGGTGAAGCAGTTAAACAGCTGCGTGAATGGGTTGATCCGCGTTTTCTGTATGTTAAAGCAGATCCG  
CCTCACCTGTTAATCTGAAACAGCCGTTTTGGCAGCCGTATACCCGTTTTGTTCTGCCGAAGGTCAGATTATG  
GTTTGGTTTGGTAATTGGTATGGTATCTGCTGGCAACCGCAATGCATGCAAGCAAACCGCTGGATGATACCC  
TGTTTGAATATGTTAGCAACATGCGTGCCTTTGAACAGGATCTGAAAAATAACAATGTGGATGTGCTGAA  
AGTGTGGTTTGTCTGAGCTGGAAAAGCCTGCAGAAACGTCTGGATGACATGGATCCGAGCGAAGTTCATTG  
GCATAAACTGCATGGTCTGGATTGGCGTAACAAAAACAGTATGATACGCTGCAAAAAGTGGTACCCGCTTT  
ACCGATGATTGGCAGATTATTGATGGTGAAGATGAAGATCTGCGCAACCATAATTTGCACAGGCAATTCTGA  
CCGCACTGCGTCATTGTCCGGAACATGAAAAAAGCAGCACTGAAATGGCAGCAGGCACCGATTCCGGATAT  
TCTGACCCAGTTTGAAGTTCAGGAGGAGATGCAAACTATAAAAGCGAACTGAAAAAAGTACCAACAG  
GTTGCAGATGCAATGCGTTGTGATGATCGTAAAGTTGTGATTGCGTTTGAAGGTATGGATGCAGCCGTTAAAG  
GCGGTGCAATTAACGTATTGTTAAAAAAGTGGATCCGCGTGAGTATGAGATTCATACCATTGCAGCACCAGGA  
AAAAATGAACTGCGTCCGTATCTGTGGCGTTTTGGAGCAAAGTGCAGAGTATGATATCACCATTTTTG  
ATCGTACCTGGTATGGTCTGTTCTGGTTGAACGTGTTGAAGGTTTTGCAACCGAAGTTGAATGGCAGCGTGC  
CTATGCAGAAATTAATCGCTTTGAAAAAATCTGAGCAGCAGCCAGACCGTGCTGATCAAATTTGGCTGGCA  
ATTGATAAAGATGAACAGGCAGCACGTTTTAAAGCACGTGAAAGCACACCGCATAAACGCTTTAAAATCACCG  
AAGAGGATTGGCGCAATCGTGATAAATGGGATGATTATCTGAAAGCCGAGCAGATATGTTTGCACATACCGA  
TACCAGCTATGCACCGTGGTATATTATCAGCACCAATGATAAACAGCAAGCCCGTATTGAAGTTCTGCGTGCAA  
TCCTGAAACAAGTAAAGCGGATCGTGATACCGATTAA

**SmPPK2:**

UniProt: Q92SA6

ATGGACACCGAAACCATTGCAAGCGCAGTTCTGAATGAAGAACAGCTGAGCCTGGATCTGATTGAAGCACAGT  
ATGCACTGATGAATACCCGTGATCAGAGCAATGCAAAAAGCCTGGTTATTCTGGTTAGCGGTATTGAACTGGC  
AGGTAAAGGTGAAGCAGTTAAACAGCTGCGTGAATGGGTTGATCCGCGTTTTCTGTATGTTAAAGCAGATCCG  
CCTCACCTGTTAATCTGAAACAGCCGTTTTGGCAGCCGTATACCCGTTTTGTTCTGCCGAAGGTCAGATTATG  
GTTTGGTTTGGTAATTGGTATGGTATCTGCTGGCAACCGCAATGCATGCAAGCAAACCGCTGGATGATACCC  
TGTTTGAATATGTTAGCAACATGCGTGCCTTTGAACAGGATCTGAAAAATAACAATGTGGATGTGCTGAA  
AGTGTGGTTTGTCTGAGCTGGAAAAGCCTGCAGAAACGTCTGGATGACATGGATCCGAGCGAAGTTCATTG  
GCATAAACTGCATGGTCTGGATTGGCGTAACAAAAACAGTATGATACGCTGCAAAAAGTGGTACCCGCTTT  
ACCGATGATTGGCAGATTATTGATGGTGAAGATGAAGATCTGCGCAACCATAATTTGCACAGGCAATTCTGA  
CCGCACTGCGTCATTGTCCGGAACATGAAAAAAGCAGCACTGAAATGGCAGCAGGCACCGATTCCGGATAT

TCTGACCCAGTTTGAAGTTC CGCAGGCAGAAGATGCAA ACTATAAAAAGCGAACTGAAAAAACTGACCAAACAG  
GTTGCAGATGCAATGCGTTGTGATGATCGTAAAGTTGTGATTGCGTTTGAAGGTATGGATGCAGCCGGTAAAG  
GCGGTGCAATTAACGTATTGTTAAAAAACTGGATCCGCGTGAGTATGAGATTCATACCATTGCAGCACCCGGA  
AAAATATGAACTGCGTCGTCGTATCTGTGGCGTTTTTGGAGCAA ACTGCAGAGTGTATGATATCACCATTTTTG  
ATCGTACCTGGTATGGTCGTGTTCTGGTTGAACGTGTTGAAGGTTTTGCAACCGAAGTTGAATGGCAGCGTGC  
CTATGCAGAAATTAATCGCTTTGAAAAAAATCTGAGCAGCAGCCAGACCGTGCTGATCAAATTTGGCTGGCA  
ATTGATAAAGATGAACAGGCAGCACGTTTTAAAGCACGTGAAAGCACACCCGCATAAACGCTTTAAAATCACCG  
AAGAGGATTGGCGCAATCGTGATAAATGGGATGATTATCTGAAAGCCGCAGCAGATATGTTTGCACATACCGA  
TACCAGCTATGCACCGTGGTATATTATCAGCACCAATGATAAACAGCAAGCCCCGTATTGAAGTTCTGCGTGCAA  
TCCTGAAACA ACTGAAAGCGGATCGTGATACCGATTAA

**MrPPK2:**

UniProt: A0A806DL21

ATGGGGTTCTGCAGCATAGAATTCCTGATGGGAGCCCAGATGAAAAAATACCGCGTTCAACCGGATGGTCGCT  
TTGAACTAAAGCGCTTCGATCCCGACGACACCAGCGCCTTTGAGGGGGGCAAGCAAGCGGCCCTGGAAGCCC  
TGGCTGTGCTCAACAGGCGTTTGGAGAAGCTGCAAGAGCTGCTGTATGCGGAAGGCCAGCACAAGTACTGG  
TGGTGTTCAGGCCATGGATGCGGGCGGCAAGGATGGCACCATCCGGGTGGTTTTCGACGGGGTAAACCCCA  
GCGGGGTGCGCGTGGCCAGTTTTGGTGTGCCACCGAGCAGGAGCTGGCCCGCGACTACCTCTGGCGGGTGC  
ACCAGCAGGTGCCCCGAAGGGTGAGCTGGTGATTTTCAACCGCTCCCACTACGAGGACGTGCTGGTGGTGC  
GGGTTAAAACTGGTGCCCAACAGGTTTGGCAGAAGCGCTACCGCCACATCCGCGAGTTTCGAGCGCATGCT  
GGCCGATGAGGGAAACCACCATCCTCAAATTTCTCCTGCATATCTCAAAGACGAGCAGCGCCAGCGTTGCGAG  
GAGCGCTTAGATAACCCCGAGAAGCGCTGAAAATTCGTATGGGCGACCTCGAGGATCGCCGGCTTTGGGAC  
AGGTATCAAGAGGCCTATGAAGCAGCCATCCGCGAGACCAGCACCGAGTATGCCCCCTGGTATGTCATTCCGG  
CCAACAAGAACTGGTACCGCAACTGGCTGGTGAGCCACATCCTG GTAGAAACCTGGAGGGCTTGGCGATGC  
AGTACCCCCAGCCCCGAAACAGCCTCGGAGAAGATTGTGATCGAGTAG

**EbPPK2:**

UniProt: A0A3D5XRJ5

ATGATTAATATCTATAAAATCGATAAACTGAACAACTTCAACCTGAACAACCACAAAACCGATGATTATAGCCT  
GTGCAAAGATAAAGATACCGCACTGAACTGACCCAGAAAAACATTAGAAAATCTATGATTATCAGCAGAAG  
CTGTACGCCGAAAAGAAAGAAGGTCTGATTATTGCATTTAGGCAATGGATGCAGCAGGTAAAGATGGCACC  
ATTCGTGAAGTTCTGAAAGCACTGGCACCCGAGGGTGTTCATGAAAAACCGTTTTAAAGCCCCGAGCAGCACCG  
AACTGGCACATGATTATCTGTGGCGTGTTTATAATGCAGTTCGGGAAAAAGGTGAAATCACCATTTTTAACCGC  
AGCCACTATGAAGATGTGCTGATTGGTAAAGTGAAAGA ACTGTACAAGTTCCAGAATAAAGCCGATCGCATTG  
ATGAAAACACCGTGGTTGATAATCGCTATGAGGATATTGCAACTTCGAGAAAATATCTGTATAATAATAGCGT G  
CGCATCATCAAAATCTTTCTGAACGTTAGCAAGAAAGAACAGGCAGAACGTTTTCTGAGCCGATTGAAGAAC  
CGGAAAAGA ACTGGAATTTAGCGATAGCGATTTTGAGGAACGTGTGTATTGGGATAAATATCAGCAGGCAT  
TTGAAGATGCCATTAATGCAACCAGCACCAAGATTGTCCGTGGTATGTTGTTCCGGCAGATCGTAAATGGTAT  
ATGCGTTATGTTGTGAGCGAAATCGTTGTGAAAACCTGGAAGAAATGAATCCGAAATATCCGACCGTTACCA  
AAGAAACTGGAACGTTTTGAAGGTTATCGTACCAA ACTGCTGGAAGAGTATAACTATGATCTGGATACCAT  
TCGTCCGATCGAGAAATGA

**ChPPK2:**

UniProt: A0A6N4SMB5 (codon optimized)

ATGGCAACCGATTTTAGCAA ACTGAGCAAATATGTTGAAACCTGCGTGTTAAACCGAAACAGAGCATTGATC  
TGAAAAAGATTTTCGACACCGACTACGATCATAAAATGCTGACCAAAGAAGAAGGCCAAGA ACTGCTGAATCT  
GGGTATTTCAA ACTGAGCGAGATCCAAGAAAAACTGTATGCAAGCGGCACCAAAAAGCGTTCTGATTGTTTTT

CAGGCAATGGATGCAGCAGGTAAAGATGGCACCGTTAAACATATTATGACCGGTCTGAATCCGCAGGGTGT  
AAAGTTACCAGCTTTAAAGTTCCGAGCAAAATCGAACTGAGCCATGATTATCTGTGGCGTCATTATGTTGCACT  
GCCTGCAACCGGTGAAATTGGTATCTTTAATCGTAGCCACTATGAAAATGTTCTGGTTACCCGTGTTTCATCCGG  
AATATCTGCTGAGCGAACAGACCAGCGGTGTTACCGCAATTGAACAGGTTAATCAGAAATCTGGGATAAACG  
CTTTCAGCAGATCAACAACCTTTGAACAGCATATTAGCGAAAACGGCACCATTTGTGCTGAAATCTTTCTGCATG  
TGAGCAAGAAAGAGCAGAAAAACGCTTTATTGAACGCATCGAACTGGACACCAAAAACCTGGAAATTTAGCA  
CAGGCGATCTGAAAGAACGTGCACATTGGAAAGATTATCGCAACGCCTATGAAGATATGCTGGCAAATACCAG  
CACCAAACAGGCACCGTGGTTTGTATTCCGGCAGATGATAAATGGTTTACCCGTCTGCTGATTGCCGAAATTA  
TCTGTACCGAACTGGAAAAACTGAATCTGACCTTCCGACCGTTAGCCTGGAACAGAAAGCAGAGCTGGAAAA  
AGCAAAAGCAGAACTGGTTGCCGAAAAAAGCAGCGATTAA

**SUMO *thscGAS***

UniProt: SUMO: Q12306; human cGAS: Q8N884

ATGTCGGACTCAGAAGTCAATCAAGAAGCTAAGCCAGAGGTCAAGCCAGAAGTCAAGCCTGAGACTCACATC  
AATTTAAAGGTGTCGATGGATCTTCAGAGATCTTCTCAAGATCAAAAAGACCACTCCTTTAAGAAGGCTGAT  
GGAAGCGTTCGCTAAAAGACAGGGTAAGGAAATGGACTCCTTAAGATTCTTGTACGACGGTATTAGAATTCAA  
GCTGATCAGACCCCTGAAGATTTGGACATGGAGGATAACGATATTATTGAGGCTCACAGAGAACAGATTGGT  
GGTATGGGGGCTCGAAGCTCCGGGCGGTTTTGGAGAAGTTGAAGCTCAGCCGCGATGATATCTCCACGGCG  
GCGGGGATGGTGAAGGGGTTGTGGACCACCTGCTGCTCAGACTGAAAGTGCGACTCCGCGTTCAGAGGCGTC  
GGGCTGCTGAACACCGGGAGCTACTATGAGCACGTGAAGATTTCTGCACCTAATGAATTTGATGTCATGTTTA  
AACTGGAAGTCCCAGAATTCAACTAGAAGAATATTCCAACACTCGTGCATATTACTTTGTGAAATTTAAAAGA  
AATCCGAAAGAAAATCCTCTGAGTCAGTTTTTAGAAGGTGAAATATTATCAGCTTCTAAGATGCTGTCAAAGTT  
TAGGAAAATCATTAAAGGAAGAAATTAACGACATTAAGATACAGATGTCATCATGAAGAGGAAAAGAGGAGG  
GAGCCCTGCTGTAACACTTCTTATTAGTGAAAAAATATCTGTGGATATAACCCTGGCTTTGGAATCAAAAAGTA  
GCTGGCCTGCTAGCACCCAAGAAGGCCTGCGCATTCAAACTGGCTTTCAGCAAAAGTTAGGAAGCAACTACG  
ACTAAAGCCATTTTACCTGTACCCAAGCATGCAAAGGAAGGAAATGGTTTCCAAGAAGAAACATGGCGGCTA  
TCCTTCTCACATCGAAAAGGAAATTTGAACAATCATGGAAAATCTAAAACGTGCTGTGAAAACAAAGAAG  
AGAAATGTTGCAGGAAAGATTGTTTAAAATAATGAAATACCTTTTAGAACAGCTGAAAGAAAGGTTTAAAGA  
CAAAAACATCTGGATAAATCTTCTTATCATGTGAAAACCTGCTTCTTTCACGTATGTACCCAGAACCTCA  
AGACAGTCAGTGGGACCGCAAAGACCTGGGCCTCTGCTTGATAACTGCGTGACATACTTTCTTCAAGTGCCTCA  
GGACAGAAAACTTGAGAATTATTTTATTCCTGAATTCATCTATTCTCTAGCACTTAATTGACAAAAGAAGTA  
AGGAATTTCTGACAAAGCAAATTTGAATATGAAAGAAACAATGAGTTTCCAGTTTTTGTGAAATTTGATAA
